# Supplementary material for: Relapse in class II orthognathic surgery: a systematic review
Source: Springer Nature journal article supplement (doi:10.1186/s12903-022-02636-x), 2022-12-15
Supplement: MOESM1 [file 23830918]

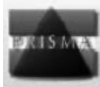

## Appendix 1 - PRISMA 2020 Checklist

| Section and Topic             | Item # | Checklist item                                                                                                                                                                                                                                                                                       | Location where item is reported |
|-------------------------------|--------|------------------------------------------------------------------------------------------------------------------------------------------------------------------------------------------------------------------------------------------------------------------------------------------------------|---------------------------------|
| <b>TITLE</b>                  |        |                                                                                                                                                                                                                                                                                                      |                                 |
| Title                         | 1      | Identify the report as a systematic review.                                                                                                                                                                                                                                                          | 1                               |
| <b>ABSTRACT</b>               |        |                                                                                                                                                                                                                                                                                                      |                                 |
| Abstract                      | 2      | See the PRISMA 2020 for Abstracts checklist.                                                                                                                                                                                                                                                         | 1-2                             |
| <b>INTRODUCTION</b>           |        |                                                                                                                                                                                                                                                                                                      |                                 |
| Rationale                     | 3      | Describe the rationale for the review in the context of existing knowledge.                                                                                                                                                                                                                          | 2-3                             |
| Objectives                    | 4      | Provide an explicit statement of the objective(s) or question(s) the review addresses.                                                                                                                                                                                                               | 2-3                             |
| <b>METHODS</b>                |        |                                                                                                                                                                                                                                                                                                      |                                 |
| Eligibility criteria          | 5      | Specify the inclusion and exclusion criteria for the review and how studies were grouped for the syntheses.                                                                                                                                                                                          | 4-5                             |
| Information sources           | 6      | Specify all databases, registers, websites, organisations, reference lists and other sources searched or consulted to identify studies. Specify the date when each source was last searched or consulted.                                                                                            | 5                               |
| Search strategy               | 7      | Present the full search strategies for all databases, registers and websites, including any filters and limits used.                                                                                                                                                                                 | 5-6<br>Appendix 2               |
| Selection process             | 8      | Specify the methods used to decide whether a study met the inclusion criteria of the review, including how many reviewers screened each record and each report retrieved, whether they worked independently, and if applicable, details of automation tools used in the process.                     | 5-6                             |
| Data collection process       | 9      | Specify the methods used to collect data from reports, including how many reviewers collected data from each report, whether they worked independently, any processes for obtaining or confirming data from study investigators, and if applicable, details of automation tools used in the process. | 6                               |
| Data items                    | 10a    | List and define all outcomes for which data were sought. Specify whether all results that were compatible with each outcome domain in each study were sought (e.g. for all measures, time points, analyses), and if not, the methods used to decide which results to collect.                        | 7                               |
|                               | 10b    | List and define all other variables for which data were sought (e.g. participant and intervention characteristics, funding sources). Describe any assumptions made about any missing or unclear information.                                                                                         | 4,7                             |
| Study risk of bias assessment | 11     | Specify the methods used to assess risk of bias in the included studies, including details of the tool(s) used, how many reviewers assessed each study and whether they worked independently, and if applicable, details of automation tools used in the process.                                    | 6                               |
| Effect measures               | 12     | Specify for each outcome the effect measure(s) (e.g. risk ratio, mean difference) used in the synthesis or presentation of results.                                                                                                                                                                  | 7                               |
| Synthesis methods             | 13a    | Describe the processes used to decide which studies were eligible for each synthesis (e.g. tabulating the study intervention characteristics and comparing against the planned groups for each synthesis (item #5)).                                                                                 | 6-7                             |
|                               | 13b    | Describe any methods required to prepare the data for presentation or synthesis, such as handling of missing summary statistics, or data conversions.                                                                                                                                                | 6-7                             |
|                               | 13c    | Describe any methods used to tabulate or visually display results of individual studies and syntheses.                                                                                                                                                                                               | 6-7; 11                         |
|                               | 13d    | Describe any methods used to synthesize results and provide a rationale for the choice(s). If meta-analysis was performed, describe the model(s), method(s) to identify the presence and extent of statistical heterogeneity, and software package(s) used.                                          | 6-8;11                          |
|                               | 13e    | Describe any methods used to explore possible causes of heterogeneity among study results (e.g. subgroup analysis, meta-regression).                                                                                                                                                                 | 6-8                             |
|                               | 13f    | Describe any sensitivity analyses conducted to assess robustness of the synthesized results.                                                                                                                                                                                                         | 6-8                             |
| Reporting bias assessment     | 14     | Describe any methods used to assess risk of bias due to missing results in a synthesis (arising from reporting biases).                                                                                                                                                                              | 6                               |



## Appendix 1 - PRISMA 2020 Checklist

| Section and Topic                              | Item # | Checklist item                                                                                                                                                                                                                                                                       | Location where item is reported |
|------------------------------------------------|--------|--------------------------------------------------------------------------------------------------------------------------------------------------------------------------------------------------------------------------------------------------------------------------------------|---------------------------------|
| Certainty assessment                           | 15     | Describe any methods used to assess certainty (or confidence) in the body of evidence for an outcome.                                                                                                                                                                                | 8                               |
| <b>RESULTS</b>                                 |        |                                                                                                                                                                                                                                                                                      |                                 |
| Study selection                                | 16a    | Describe the results of the search and selection process, from the number of records identified in the search to the number of studies included in the review, ideally using a flow diagram.                                                                                         | 8                               |
|                                                | 16b    | Cite studies that might appear to meet the inclusion criteria, but which were excluded, and explain why they were excluded.                                                                                                                                                          | 9; Appendix 3                   |
| Study characteristics                          | 17     | Cite each included study and present its characteristics.                                                                                                                                                                                                                            | 9                               |
| Risk of bias in studies                        | 18     | Present assessments of risk of bias for each included study.                                                                                                                                                                                                                         | 10                              |
| Results of individual studies                  | 19     | For all outcomes, present, for each study: (a) summary statistics for each group (where appropriate) and (b) an effect estimate and its precision (e.g. confidence/credible interval), ideally using structured tables or plots.                                                     | 10-12                           |
| Results of syntheses                           | 20a    | For each synthesis, briefly summarise the characteristics and risk of bias among contributing studies.                                                                                                                                                                               | 10-11                           |
|                                                | 20b    | Present results of all statistical syntheses conducted. If meta-analysis was done, present for each the summary estimate and its precision (e.g. confidence/credible interval) and measures of statistical heterogeneity. If comparing groups, describe the direction of the effect. | 10-11                           |
|                                                | 20c    | Present results of all investigations of possible causes of heterogeneity among study results.                                                                                                                                                                                       | 12                              |
|                                                | 20d    | Present results of all sensitivity analyses conducted to assess the robustness of the synthesized results.                                                                                                                                                                           | 12                              |
| Reporting biases                               | 21     | Present assessments of risk of bias due to missing results (arising from reporting biases) for each synthesis assessed.                                                                                                                                                              | 10                              |
| Certainty of evidence                          | 22     | Present assessments of certainty (or confidence) in the body of evidence for each outcome assessed.                                                                                                                                                                                  | 12                              |
| <b>DISCUSSION</b>                              |        |                                                                                                                                                                                                                                                                                      |                                 |
| Discussion                                     | 23a    | Provide a general interpretation of the results in the context of other evidence.                                                                                                                                                                                                    | 12-14                           |
|                                                | 23b    | Discuss any limitations of the evidence included in the review.                                                                                                                                                                                                                      | 12-14                           |
|                                                | 23c    | Discuss any limitations of the review processes used.                                                                                                                                                                                                                                | 12-14                           |
|                                                | 23d    | Discuss implications of the results for practice, policy, and future research.                                                                                                                                                                                                       | 14                              |
| <b>OTHER INFORMATION</b>                       |        |                                                                                                                                                                                                                                                                                      |                                 |
| Registration and protocol                      | 24a    | Provide registration information for the review, including register name and registration number, or state that the review was not registered.                                                                                                                                       | 4;15                            |
|                                                | 24b    | Indicate where the review protocol can be accessed, or state that a protocol was not prepared.                                                                                                                                                                                       | 4;15                            |
|                                                | 24c    | Describe and explain any amendments to information provided at registration or in the protocol.                                                                                                                                                                                      | 4;15                            |
| Support                                        | 25     | Describe sources of financial or non-financial support for the review, and the role of the funders or sponsors in the review.                                                                                                                                                        | 14                              |
| Competing interests                            | 26     | Declare any competing interests of review authors.                                                                                                                                                                                                                                   | 15                              |
| Availability of data, code and other materials | 27     | Report which of the following are publicly available and where they can be found: template data collection forms; data extracted from included studies; data used for all analyses; analytic code; any other materials used in the review.                                           | 15                              |

## **Appendix 2 – search history**

Performance of research and documentation  
Dr. Helge Knüttel, librarian of university of Regensburg

# Protocol

## Limitations

- Date of publication: no limits
- Language: no limits

## Sources for research

### Databases

| Name of Database                                         | Provider / Interface | Time period covered |
|----------------------------------------------------------|----------------------|---------------------|
| EMBASE                                                   | Ovid                 | 1974–current        |
| MEDLINE                                                  | Ovid                 | 1946–current        |
| Cochrane Library:                                        |                      |                     |
| CDRS (Cochrane Database of Systematic Reviews)           | Wiley Online Library | 1995–current        |
| CENTRAL (Cochrane Central Register of Controlled Trials) | Wiley Online Library | 1948–current        |
| DARE (Database of Abstracts of Reviews of Effect)        | Wiley Online Library | 1995–2015           |
| NHS Economic Evaluation Database                         | Wiley Online Library | 1994– 2015          |
| HTA (Health Technology Assessment Database)              | Wiley Online Library | 1988– 2015          |
| Science Citation Index Expanded                          | Web of Science       | 1965–current        |
| ClinicalTrials.gov                                       | NLM                  | ---                 |
| International Clinical Trials Registry Platform          | WHO                  | ---                 |
| Google Scholar                                           | Google               | ---                 |

### ***Prepared searchterm***

This searchterm was prepared and has a form which could be refined easily then the exported searchterm of the search platform

### ***Searchterm***

Entered terms may changed by the search platform. The exported version of the platform is documented

## EMBASE

|                                                                                                                                                                                                                                                                                                                                                                                                                                                                                                                                                                                                                                                                                                                                                                                                                                                                  |  |
|------------------------------------------------------------------------------------------------------------------------------------------------------------------------------------------------------------------------------------------------------------------------------------------------------------------------------------------------------------------------------------------------------------------------------------------------------------------------------------------------------------------------------------------------------------------------------------------------------------------------------------------------------------------------------------------------------------------------------------------------------------------------------------------------------------------------------------------------------------------|--|
| Datenbank                                                                                                                                                                                                                                                                                                                                                                                                                                                                                                                                                                                                                                                                                                                                                                                                                                                        |  |
| Embase 1974 to 2019 July 15 (oemezd)                                                                                                                                                                                                                                                                                                                                                                                                                                                                                                                                                                                                                                                                                                                                                                                                                             |  |
| Platform (potentially incl. Version)                                                                                                                                                                                                                                                                                                                                                                                                                                                                                                                                                                                                                                                                                                                                                                                                                             |  |
| Ovid                                                                                                                                                                                                                                                                                                                                                                                                                                                                                                                                                                                                                                                                                                                                                                                                                                                             |  |
| Time period of platform                                                                                                                                                                                                                                                                                                                                                                                                                                                                                                                                                                                                                                                                                                                                                                                                                                          |  |
| 1974–2019                                                                                                                                                                                                                                                                                                                                                                                                                                                                                                                                                                                                                                                                                                                                                                                                                                                        |  |
| Time limitation                                                                                                                                                                                                                                                                                                                                                                                                                                                                                                                                                                                                                                                                                                                                                                                                                                                  |  |
| none                                                                                                                                                                                                                                                                                                                                                                                                                                                                                                                                                                                                                                                                                                                                                                                                                                                             |  |
| Standard-searchfilter                                                                                                                                                                                                                                                                                                                                                                                                                                                                                                                                                                                                                                                                                                                                                                                                                                            |  |
| none                                                                                                                                                                                                                                                                                                                                                                                                                                                                                                                                                                                                                                                                                                                                                                                                                                                             |  |
| other limitations                                                                                                                                                                                                                                                                                                                                                                                                                                                                                                                                                                                                                                                                                                                                                                                                                                                |  |
| none                                                                                                                                                                                                                                                                                                                                                                                                                                                                                                                                                                                                                                                                                                                                                                                                                                                             |  |
| Date of search                                                                                                                                                                                                                                                                                                                                                                                                                                                                                                                                                                                                                                                                                                                                                                                                                                                   |  |
| 2019-07-16                                                                                                                                                                                                                                                                                                                                                                                                                                                                                                                                                                                                                                                                                                                                                                                                                                                       |  |
| Executed by                                                                                                                                                                                                                                                                                                                                                                                                                                                                                                                                                                                                                                                                                                                                                                                                                                                      |  |
| Helge Knüttel                                                                                                                                                                                                                                                                                                                                                                                                                                                                                                                                                                                                                                                                                                                                                                                                                                                    |  |
| Peer Review                                                                                                                                                                                                                                                                                                                                                                                                                                                                                                                                                                                                                                                                                                                                                                                                                                                      |  |
| no                                                                                                                                                                                                                                                                                                                                                                                                                                                                                                                                                                                                                                                                                                                                                                                                                                                               |  |
| Quantity of matches (with doublets)                                                                                                                                                                                                                                                                                                                                                                                                                                                                                                                                                                                                                                                                                                                                                                                                                              |  |
| 4548                                                                                                                                                                                                                                                                                                                                                                                                                                                                                                                                                                                                                                                                                                                                                                                                                                                             |  |
| Exportformat of matches                                                                                                                                                                                                                                                                                                                                                                                                                                                                                                                                                                                                                                                                                                                                                                                                                                          |  |
| OvidSP für Citavi (Citavi-Importfilter: OvidSP)                                                                                                                                                                                                                                                                                                                                                                                                                                                                                                                                                                                                                                                                                                                                                                                                                  |  |
| <p>4548 matches were totally exported in portions of the maximum of 1000</p> <pre>\$ for file in `find . -name 'kaluza_2738_2019-07-16_EMBASE_r*-.ovd' -print` ; do echo \$file; grep "^DB - Embase" \$file   wc -l ; done ./kaluza_2738_2019-07-16_EMBASE_r0001-1000.ovd 1000 ./kaluza_2738_2019-07-16_EMBASE_r1001-2000.ovd 1000 ./kaluza_2738_2019-07-16_EMBASE_r2001-3000.ovd 1000 ./kaluza_2738_2019-07-16_EMBASE_r3001-4000.ovd 1000 ./kaluza_2738_2019-07-16_EMBASE_r4001-4548.ovd 548</pre> <p>export-file within doublets : (Export-)Felds UI (= Accession Number/AN) enthalten:</p> <pre>\$ for file in `find . -name 'kaluza_2738_2019-07-16_EMBASE_r*-.ovd' -print` ; do echo \$file; grep "^UI - " \$file   sort   uniq   wc -l ; done ./kaluza_2738_2019-07-16_EMBASE_r0001-1000.ovd 995 ./kaluza_2738_2019-07-16_EMBASE_r1001-2000.ovd 1000</pre> |  |

```
./kaluza_2738_2019-07-16_EMBASE_r2001-3000.ovd
1000
./kaluza_2738_2019-07-16_EMBASE_r3001-4000.ovd
1000
./kaluza_2738_2019-07-16_EMBASE_r4001-4548.ovd
548
```

Considering the total quantity of matches of 4548 database entries within all files, there are 4538 individual matches included (ANs):

```
$ grep --no-filename "^UI - " kaluza_2738_2019-07-16_EMBASE_r*-.ovd | sort | uniq | wc -l
4538
```

The different export files were pooled to ease the import and reduce error source

```
$ cat kaluza_2738_2019-07-16_EMBASE_r*-.ovd >> kaluza_2738_2019-07-16_EMBASE_allrecords.ovd
```

**Search history**

| # | Search statement                                                                                                                                                                                                                                                                                                                                                                                                                                                                                                                                                                                                                                                                                                                                                                                                                                                                                    | Record count | Annotation                                           |
|---|-----------------------------------------------------------------------------------------------------------------------------------------------------------------------------------------------------------------------------------------------------------------------------------------------------------------------------------------------------------------------------------------------------------------------------------------------------------------------------------------------------------------------------------------------------------------------------------------------------------------------------------------------------------------------------------------------------------------------------------------------------------------------------------------------------------------------------------------------------------------------------------------------------|--------------|------------------------------------------------------|
| 1 | Retrognathia/ or micrognathia/ or ("class II" or "class 2") and malocclusion\$.ti,ab,kw. or (posterior adj3 occlusion\$.ti,ab,kw. or (distocclusion\$ or disto-occlusion\$ or distocclusion\$.ti,ab,kw. or (distal adj (occlusion\$ or bite\$)).ti,ab,kw. or retrognath\$.ti,ab,kw. or (prominent adj3 upper adj3 teeth).ti,ab,kw. or (overjet\$ or over jet\$).ti,ab,kw. or (overbite\$ or over bite\$).ti,ab,kw. or (deepbite\$ or deep bite\$).ti,ab,kw. or (mandib\$ adj3 (micrognath\$ or retropos\$ or retrus\$)).ti,ab,kw. or (maxill\$ adj3 (prognath\$ or anteposition\$)).ti,ab,kw.                                                                                                                                                                                                                                                                                                       | 14268        | angle class II malocclusion                          |
| 2 | exp orthognathic surgery/ or oral surgery/ or orthognath*.ti,ab,kw. or (orthodont* and (surgery or surgeries or surgical)).ti,ab,kw. or ((mandib* or jaw* or maxill* or bimaxillary or Prognath* or Retrognath* or occlusion or malocclusion or angle or "class II" or "class 2" or nonocclusion or overbite* or "over bite*" or openbite* or "open bite*" or "deep bite*" or deepbite* or "over jet*" or overjet* or dentofacial or "dento facial" or ramal or ramus) adj3 (surg* or procedure* or operation* or operative or correct* or osteotom* or advancement or reduction* or reposition* or setback or advancement or retropos* or retrus* or fixation* or distract* or resect*)).ti,ab,kw. or (mandibulotom* or mandibulectom* or hemimandibulectom* or maxillotom* or maxillectom*).ti,ab,kw. or ("Le Fort" or lefort).ti,ab,kw. or ((exp jaw malformation/ or malocclusion/) and su.fs.) | 77357        | orthognathic surgery                                 |
| 3 | 1 and 2                                                                                                                                                                                                                                                                                                                                                                                                                                                                                                                                                                                                                                                                                                                                                                                                                                                                                             | 4548         | angle class II malocclusion AND orthognathic surgery |



## MEDLINE

|                                                                                                                                                                                                                                                                                                                                                                                                                                                                                                                                                                                                                                                                                                                                                                                                                                                                                            |  |
|--------------------------------------------------------------------------------------------------------------------------------------------------------------------------------------------------------------------------------------------------------------------------------------------------------------------------------------------------------------------------------------------------------------------------------------------------------------------------------------------------------------------------------------------------------------------------------------------------------------------------------------------------------------------------------------------------------------------------------------------------------------------------------------------------------------------------------------------------------------------------------------------|--|
| Database                                                                                                                                                                                                                                                                                                                                                                                                                                                                                                                                                                                                                                                                                                                                                                                                                                                                                   |  |
| Ovid MEDLINE(R) ALL 1946 to July 15, 2019 (medall)                                                                                                                                                                                                                                                                                                                                                                                                                                                                                                                                                                                                                                                                                                                                                                                                                                         |  |
| Platform (potentially incl. Version)                                                                                                                                                                                                                                                                                                                                                                                                                                                                                                                                                                                                                                                                                                                                                                                                                                                       |  |
| Ovid                                                                                                                                                                                                                                                                                                                                                                                                                                                                                                                                                                                                                                                                                                                                                                                                                                                                                       |  |
| Time period of database                                                                                                                                                                                                                                                                                                                                                                                                                                                                                                                                                                                                                                                                                                                                                                                                                                                                    |  |
| about 1946–2019                                                                                                                                                                                                                                                                                                                                                                                                                                                                                                                                                                                                                                                                                                                                                                                                                                                                            |  |
| Time limitation                                                                                                                                                                                                                                                                                                                                                                                                                                                                                                                                                                                                                                                                                                                                                                                                                                                                            |  |
| none                                                                                                                                                                                                                                                                                                                                                                                                                                                                                                                                                                                                                                                                                                                                                                                                                                                                                       |  |
| Standard-searchfilter                                                                                                                                                                                                                                                                                                                                                                                                                                                                                                                                                                                                                                                                                                                                                                                                                                                                      |  |
| none                                                                                                                                                                                                                                                                                                                                                                                                                                                                                                                                                                                                                                                                                                                                                                                                                                                                                       |  |
| Other limitations                                                                                                                                                                                                                                                                                                                                                                                                                                                                                                                                                                                                                                                                                                                                                                                                                                                                          |  |
| Removal of animal-only studies via check tags.                                                                                                                                                                                                                                                                                                                                                                                                                                                                                                                                                                                                                                                                                                                                                                                                                                             |  |
| Date of search                                                                                                                                                                                                                                                                                                                                                                                                                                                                                                                                                                                                                                                                                                                                                                                                                                                                             |  |
| 2019-07-16                                                                                                                                                                                                                                                                                                                                                                                                                                                                                                                                                                                                                                                                                                                                                                                                                                                                                 |  |
| Executed by                                                                                                                                                                                                                                                                                                                                                                                                                                                                                                                                                                                                                                                                                                                                                                                                                                                                                |  |
| Helge Knüttel                                                                                                                                                                                                                                                                                                                                                                                                                                                                                                                                                                                                                                                                                                                                                                                                                                                                              |  |
| Peer Review                                                                                                                                                                                                                                                                                                                                                                                                                                                                                                                                                                                                                                                                                                                                                                                                                                                                                |  |
| no                                                                                                                                                                                                                                                                                                                                                                                                                                                                                                                                                                                                                                                                                                                                                                                                                                                                                         |  |
| Quantity of matches with doublets                                                                                                                                                                                                                                                                                                                                                                                                                                                                                                                                                                                                                                                                                                                                                                                                                                                          |  |
| 5284                                                                                                                                                                                                                                                                                                                                                                                                                                                                                                                                                                                                                                                                                                                                                                                                                                                                                       |  |
| Exportformat of matches                                                                                                                                                                                                                                                                                                                                                                                                                                                                                                                                                                                                                                                                                                                                                                                                                                                                    |  |
| OvidSP für Citavi (Citavi-Importfilter: OvidSP)                                                                                                                                                                                                                                                                                                                                                                                                                                                                                                                                                                                                                                                                                                                                                                                                                                            |  |
| <p>5284 matches were exported totally in portions of the maximum of 1000 :</p> <pre>\$ for file in `find . -name 'kaluza_2738_2019-07-16_MEDLINE_r*-*'.ovd' -print` ; do echo \$file; grep "^DB - Ovid MEDLINE(R)" \$file   wc -l ; done ./kaluza_2738_2019-07-16_MEDLINE_r0001-1000.ovd 1000 ./kaluza_2738_2019-07-16_MEDLINE_r1001-2000.ovd 1000 ./kaluza_2738_2019-07-16_MEDLINE_r2001-3000.ovd 1000 ./kaluza_2738_2019-07-16_MEDLINE_r3001-4000.ovd 1000 ./kaluza_2738_2019-07-16_MEDLINE_r4001-5000.ovd 1000 ./kaluza_2738_2019-07-16_MEDLINE_r5001-5284.ovd 284</pre> <p>In on Export-file are doublets: (Export-)Felds UI (= Accession Number/AN) enthalten:</p> <pre>\$ for file in `find . -name 'kaluza_2738_2019-07-16_MEDLINE_r*-*'.ovd' -print` ; do echo \$file; grep "^UI - " \$file   sort   uniq   wc -l ; done ./kaluza_2738_2019-07-16_MEDLINE_r0001-1000.ovd 997</pre> |  |

```
./kaluza_2738_2019-07-16_MEDLINE_r1001-2000.ovd
1000
./kaluza_2738_2019-07-16_MEDLINE_r2001-3000.ovd
1000
./kaluza_2738_2019-07-16_MEDLINE_r3001-4000.ovd
1000
./kaluza_2738_2019-07-16_MEDLINE_r4001-5000.ovd
1000
./kaluza_2738_2019-07-16_MEDLINE_r5001-5284.ovd
284
```

Considering the total quantity of matches of 5284 database entries within all files, there are 5281 individual matches included (ANs):

```
$ grep --no-filename "^UI - " kaluza_2738_2019-07-16_ME
DLINE_r*-.ovd | sort | uniq | wc -l
5281
```

**Search history**

| # | Search statement                                                                                                                                                                                                                                                                                                                                                                                                                                                                                                                                                                                                                                                                                                                                                                                                                                                                                                                                                                                                                                                                                                                                                                                                                                               | Record count | Annotation                                          |
|---|----------------------------------------------------------------------------------------------------------------------------------------------------------------------------------------------------------------------------------------------------------------------------------------------------------------------------------------------------------------------------------------------------------------------------------------------------------------------------------------------------------------------------------------------------------------------------------------------------------------------------------------------------------------------------------------------------------------------------------------------------------------------------------------------------------------------------------------------------------------------------------------------------------------------------------------------------------------------------------------------------------------------------------------------------------------------------------------------------------------------------------------------------------------------------------------------------------------------------------------------------------------|--------------|-----------------------------------------------------|
| 1 | exp Malocclusion, Angle Class II/ or Retrognathia/ or Micrognathism/ or (("class II" or "class 2") and malocclusion\$.ti,ab,kf. or (posterior adj3 occlusion\$.ti,ab,kf. or (distocclusion\$ or disto-occlusion\$ or distocclusion\$.ti,ab,kf. or (distal adj (occlusion\$ or bite\$)).ti,ab,kf. or retrognath\$.ti,ab,kf. or (prominent adj3 upper adj3 teeth).ti,ab,kf. or (overjet\$ or over jet\$).ti,ab,kf. or (overbite\$ or over bite\$).ti,ab,kf. or (deepbite\$ or deep bite\$).ti,ab,kf. or (mandib\$ adj3 (micrognath\$ or retropos\$ or retrus\$)).ti,ab,kf. or (maxill\$ adj3 (prognath\$ or anteposition\$)).ti,ab,kf.                                                                                                                                                                                                                                                                                                                                                                                                                                                                                                                                                                                                                           | 14012        | angle class II malocclusion                         |
| 2 | exp orthognathic surgical procedures/ or osteotomy, le fort/ or osteotomy, sagittal split ramus/ or Osteotomy/ or Surgery, Oral/ or Oral Surgical Procedures/ or Jaw Fixation Techniques/ or Mandibular Advancement/ or exp Orthognathic Surgical Procedures/ or ((Jaw Abnormalities/ or exp Malocclusion/ or Micrognathism/ or Retrognathia/ or exp Jaw/) and su.fs.) or orthognath*.ti,ab,kf. or (orthodont* and (surgery or surgeries or surgical)).ti,ab,kf. or ((mandib* or jaw* or maxill* or bimaxillary or Prognath* or Retrognath* or occlusion or malocclusion or angle or "class II" or "class 2" or nonocclusion or overbite* or "over bite*" or openbite* or "open bite*" or "deep bite*" or deepbite* or "over jet*" or overjet* or dentofacial or "dento facial" or ramal or ramus) adj3 (surg* or procedure* or operation* or operative or correct* or osteotom* or advancement or reduction* or reposition* or setback or advancement or retropos* or retrus* or fixation* or distract* or resect*).ti,ab,kf. or (mandibulotom* or mandibulectom* or hemimandibulectom* or maxillotom* or maxillectom*).ti,ab,kf. or ("Le Fort" or lefort).ti,ab,kf. or ((jaw abnormalities/ or micrognathism/ or retrognathia/ or malocclusion/) and su.fs.) | 102499       | orthognatic surgery                                 |
| 3 | 1 and 2                                                                                                                                                                                                                                                                                                                                                                                                                                                                                                                                                                                                                                                                                                                                                                                                                                                                                                                                                                                                                                                                                                                                                                                                                                                        | 5328         | angle class II malocclusion AND orthognatic surgery |
| 4 | 3 not (animals/ not human/)                                                                                                                                                                                                                                                                                                                                                                                                                                                                                                                                                                                                                                                                                                                                                                                                                                                                                                                                                                                                                                                                                                                                                                                                                                    | 5284         | exclusion of animal-only studies                    |

## Cochrane Library

|                                                                                                                                                                                                                                                                                                                                                                                                                     |  |
|---------------------------------------------------------------------------------------------------------------------------------------------------------------------------------------------------------------------------------------------------------------------------------------------------------------------------------------------------------------------------------------------------------------------|--|
| Database                                                                                                                                                                                                                                                                                                                                                                                                            |  |
| Cochrane Library:                                                                                                                                                                                                                                                                                                                                                                                                   |  |
| <ul style="list-style-type: none"> <li>• CDRS (Cochrane Database of Systematic Reviews)</li> <li>• DARE (Database of Abstracts of Reviews of Effect)</li> <li>• CENTRAL (Cochrane Central Register of Controlled Trials)</li> <li>• HTA (Health Technology Assessment Database)</li> <li>• EED (NHS Economic Evaluation Database)</li> </ul>                                                                        |  |
| Platform (potentially incl. Version)                                                                                                                                                                                                                                                                                                                                                                                |  |
| Wiley Online Library                                                                                                                                                                                                                                                                                                                                                                                                |  |
| Time period of database                                                                                                                                                                                                                                                                                                                                                                                             |  |
| <ul style="list-style-type: none"> <li>• CDRS (Cochrane Database of Systematic Reviews): 1993–current</li> <li>• DARE (Database of Abstracts of Reviews of Effect): 1995–2015</li> <li>• CENTRAL (Cochrane Central Register of Controlled Trials): 1948–current</li> <li>• HTA (Health Technology Assessment Database): 1994– 2017</li> <li>• EED (NHS Economic Evaluation Database): 1988– 2015</li> </ul>         |  |
| Time limitation                                                                                                                                                                                                                                                                                                                                                                                                     |  |
| none                                                                                                                                                                                                                                                                                                                                                                                                                |  |
| Standard-searchfilter                                                                                                                                                                                                                                                                                                                                                                                               |  |
| none                                                                                                                                                                                                                                                                                                                                                                                                                |  |
| Other limitations                                                                                                                                                                                                                                                                                                                                                                                                   |  |
| none                                                                                                                                                                                                                                                                                                                                                                                                                |  |
| Date of search                                                                                                                                                                                                                                                                                                                                                                                                      |  |
| 2019-07-16                                                                                                                                                                                                                                                                                                                                                                                                          |  |
| Executed by                                                                                                                                                                                                                                                                                                                                                                                                         |  |
| Helge Knüttel                                                                                                                                                                                                                                                                                                                                                                                                       |  |
| Peer Review                                                                                                                                                                                                                                                                                                                                                                                                         |  |
| no                                                                                                                                                                                                                                                                                                                                                                                                                  |  |
| Quantity of matches with doublets                                                                                                                                                                                                                                                                                                                                                                                   |  |
| total: 353 <ul style="list-style-type: none"> <li>• Cochrane Reviews: 5</li> <li>• Trials: 348</li> </ul>                                                                                                                                                                                                                                                                                                           |  |
| Exportformat of matches                                                                                                                                                                                                                                                                                                                                                                                             |  |
| RIS (Reference Manager)                                                                                                                                                                                                                                                                                                                                                                                             |  |
| <p>The matches were exported in RIS-files in total. The search interface allows this only separated for every individual database of Cochrane Library:</p> <pre> \$ for file in `find . -name 'kaluza_2738_2019-07-16_Cochrane*.ris' -print` ; do echo \$file; grep " ^TY - " \$file   wc -l ; done ./kaluza_2738_2019-07-16_Cochrane_CDSR.ris 5 ./kaluza_2738_2019-07-16_Cochrane_CENTRAL.ris 348           </pre> |  |

### Search history

| ID  | Search                                                                                                                                                                                                                                                                                                                                                                                                                                                                                                                                                                                           | Hits |
|-----|--------------------------------------------------------------------------------------------------------------------------------------------------------------------------------------------------------------------------------------------------------------------------------------------------------------------------------------------------------------------------------------------------------------------------------------------------------------------------------------------------------------------------------------------------------------------------------------------------|------|
| #1  | ((class NEXT II) OR (class NEXT 2)) and malocclusion*):ti,ab,kw                                                                                                                                                                                                                                                                                                                                                                                                                                                                                                                                  | 477  |
| #2  | (posterior NEAR/3 occlusion*):ti,ab,kw                                                                                                                                                                                                                                                                                                                                                                                                                                                                                                                                                           | 26   |
| #3  | (distocclusion* OR disto-occlusion* OR distocclusion*):ti,ab,kw                                                                                                                                                                                                                                                                                                                                                                                                                                                                                                                                  | 9    |
| #4  | (distal NEXT (occlusion* OR bite*)):ti,ab,kw                                                                                                                                                                                                                                                                                                                                                                                                                                                                                                                                                     | 32   |
| #5  | (retrognath*):ti,ab,kw                                                                                                                                                                                                                                                                                                                                                                                                                                                                                                                                                                           | 83   |
| #6  | (prominent NEAR/3 upper NEAR/3 teeth):ti,ab,kw                                                                                                                                                                                                                                                                                                                                                                                                                                                                                                                                                   | 3    |
| #7  | (overjet* OR (over NEXT jet*)):ti,ab,kw                                                                                                                                                                                                                                                                                                                                                                                                                                                                                                                                                          | 220  |
| #8  | (overbite* OR (over NEXT bite*)):ti,ab,kw                                                                                                                                                                                                                                                                                                                                                                                                                                                                                                                                                        | 162  |
| #9  | (deepbite* OR (deep NEXT bite*)):ti,ab,kw                                                                                                                                                                                                                                                                                                                                                                                                                                                                                                                                                        | 21   |
| #10 | (mandib* NEAR/3 (micrognath* OR retropos* OR retrus*)):ti,ab,kw                                                                                                                                                                                                                                                                                                                                                                                                                                                                                                                                  | 32   |
| #11 | (maxill* NEAR/3 (prognath* OR anteponition*)):ti,ab,kw                                                                                                                                                                                                                                                                                                                                                                                                                                                                                                                                           | 5    |
| #12 | #1 OR #2 OR #3 OR #4 OR #5 OR #6 OR #7 OR #8 OR #9 OR #10 OR #11                                                                                                                                                                                                                                                                                                                                                                                                                                                                                                                                 | 749  |
| #13 | (orthognath*):ti,ab,kw                                                                                                                                                                                                                                                                                                                                                                                                                                                                                                                                                                           | 445  |
| #14 | (orthodont* AND (surgery OR surgeries OR surgical)):ti,ab,kw                                                                                                                                                                                                                                                                                                                                                                                                                                                                                                                                     | 465  |
| #15 | ( (mandib* OR jaw* OR maxill* OR bimaxillary OR Prognath* OR Retrognath* OR occlusion OR malocclusion OR angle OR (class NEXT II) OR (class NEXT 2) OR nonocclusion OR overbite* OR (over NEXT bite*) OR openbite* OR (open NEXT bite*) OR (deep NEXT bite*) OR deepbite* OR (over NEXT jet*) OR overjet* OR dentofacial OR (dento NEXT facial) OR ramal OR ramus) NEAR/3 (surg* OR procedure* OR operation* OR operative OR correct* OR osteotom* OR advancement OR reduction* OR reposition* OR setback OR advancement OR retropos* OR retrus* OR fixation* OR distract* OR resect*)):ti,ab,kw | 5013 |
| #16 | (mandibulotom* OR mandibulectom* OR hemimandibulectom* OR maxillotom* OR maxillectom*):ti,ab,kw                                                                                                                                                                                                                                                                                                                                                                                                                                                                                                  | 47   |
| #17 | ((Le NEXT Fort) OR lefort):ti,ab,kw                                                                                                                                                                                                                                                                                                                                                                                                                                                                                                                                                              | 194  |
| #18 | #13 OR #14 OR #15 OR #16 OR #17                                                                                                                                                                                                                                                                                                                                                                                                                                                                                                                                                                  | 5503 |
| #19 | #12 AND #18                                                                                                                                                                                                                                                                                                                                                                                                                                                                                                                                                                                      | 353  |

## Science Citation Index Expanded / Web of Science

|                                                                                                                                                                                                                                        |  |
|----------------------------------------------------------------------------------------------------------------------------------------------------------------------------------------------------------------------------------------|--|
| Database                                                                                                                                                                                                                               |  |
| Science Citation Index Expanded (SCI-EXPANDED)<br>Data last updated: 2019-07-15                                                                                                                                                        |  |
| Plattform (potentially incl. Version)                                                                                                                                                                                                  |  |
| Web of Science                                                                                                                                                                                                                         |  |
| Time period of database                                                                                                                                                                                                                |  |
| Science Citation Index Expanded (SCI-EXPANDED) --1965-present                                                                                                                                                                          |  |
| Time limitation                                                                                                                                                                                                                        |  |
| none                                                                                                                                                                                                                                   |  |
| Standard-searchterm                                                                                                                                                                                                                    |  |
| none                                                                                                                                                                                                                                   |  |
| Other limitations                                                                                                                                                                                                                      |  |
| none                                                                                                                                                                                                                                   |  |
| Date of search                                                                                                                                                                                                                         |  |
| 2019-07-16                                                                                                                                                                                                                             |  |
| Executed by                                                                                                                                                                                                                            |  |
| Helge Knüttel                                                                                                                                                                                                                          |  |
| Peer Review                                                                                                                                                                                                                            |  |
| no                                                                                                                                                                                                                                     |  |
| Quantity of matches with doublets                                                                                                                                                                                                      |  |
| 2024                                                                                                                                                                                                                                   |  |
| Exportformat of matches                                                                                                                                                                                                                |  |
| Other reference software<br>Import in Citavi mit dem Textfilter „Web of Scienc (WoS)“                                                                                                                                                  |  |
| Export of the search history was not possible                                                                                                                                                                                          |  |
| Quantity of exported matches was verified:<br>> grep "^ER\$" kaluza_2738_2019-07-16_WoS_r*-.txt   wc -l<br>> 2024                                                                                                                      |  |
| Considering the total quantity of matches of 2024 database entries within all files, there are 2024 individual matches included (ANs):<br>> grep --no-filename "^UT " kaluza_2738_2019-07-16_WoS_r*-.txt   sort   uniq   wc -l<br>2024 |  |
| The different export files were pooled to ease the import and reduce error sources<br>unite_wos_files.bash kaluza_2738_2019-07-16_WoS_r*.txt > kaluza_2738_2019-07-16_WoS_allrecords.txt                                               |  |

## Searchhistory

| Set | Results                                                                                                                                                                                                                                                                                                                                                                                                                                                                                                                                                                                                                                                                                                                                                                                                                                                             | Save History / Create Alert | Open Saved History | Edit Sets | Combine Sets<br><input type="radio"/> AND <input type="radio"/> OR<br>Combine | Delete Sets<br>Select All<br>X Delete |
|-----|---------------------------------------------------------------------------------------------------------------------------------------------------------------------------------------------------------------------------------------------------------------------------------------------------------------------------------------------------------------------------------------------------------------------------------------------------------------------------------------------------------------------------------------------------------------------------------------------------------------------------------------------------------------------------------------------------------------------------------------------------------------------------------------------------------------------------------------------------------------------|-----------------------------|--------------------|-----------|-------------------------------------------------------------------------------|---------------------------------------|
| # 7 | 2,024<br>#6 OR #5 OR #4 OR #3<br><i>Indexes=SCI-EXPANDED Timespan=All years</i>                                                                                                                                                                                                                                                                                                                                                                                                                                                                                                                                                                                                                                                                                                                                                                                     |                             |                    | Edit      | <input type="checkbox"/>                                                      | <input type="checkbox"/>              |
| # 6 | 129<br>CITED AUTHOR: (Proffit W*) AND CITED WORK: (HEAD FACE MEDICINE)<br><i>Indexes=SCI-EXPANDED Timespan=All years</i>                                                                                                                                                                                                                                                                                                                                                                                                                                                                                                                                                                                                                                                                                                                                            |                             |                    |           | <input type="checkbox"/>                                                      | <input type="checkbox"/>              |
| # 5 | 64<br>CITED AUTHOR: (Bailey L*) AND CITED WORK: ("AMERICAN JOURNAL OF ORTHODONTICS AND DENTOFACIAL ORTHOPEDICS" OR "AMERICAN JOURNAL OF ORTHODONTICS AND DENTOFACIAL ORTHOPEDICS OFFICIAL PUBLICATION OF THE AMERICAN ASSOCIATION OF ORTHODONTISTS ITS CONSTITUENT SOCIETIES AND THE AMERICAN BOARD OF ORTHODONTICS") AND CITED YEAR: (2004)<br><i>Indexes=SCI-EXPANDED Timespan=All years</i>                                                                                                                                                                                                                                                                                                                                                                                                                                                                      |                             |                    |           | <input type="checkbox"/>                                                      | <input type="checkbox"/>              |
| # 4 | 171<br>CITED AUTHOR: (Proffit W*) AND CITED WORK: (Int J Adult Orthodon Orthognath Surg) AND CITED YEAR: (1996) AND CITED VOLUME: (11) AND CITED PAGES: (191)<br><i>Indexes=SCI-EXPANDED Timespan=All years</i>                                                                                                                                                                                                                                                                                                                                                                                                                                                                                                                                                                                                                                                     |                             |                    |           | <input type="checkbox"/>                                                      | <input type="checkbox"/>              |
| # 3 | 1,782<br>#1 AND #2<br><i>Indexes=SCI-EXPANDED Timespan=All years</i>                                                                                                                                                                                                                                                                                                                                                                                                                                                                                                                                                                                                                                                                                                                                                                                                |                             |                    | Edit      | <input type="checkbox"/>                                                      | <input type="checkbox"/>              |
| # 2 | 40,644<br>(TS=(orthognath*)) OR (TS=(orthodont* AND ("surgery" OR "surgeries" OR "surgical"))) OR (TS=( (mandib* OR jaw* OR maxill* OR "bimaxillary" OR Prognath* OR Retrognath* OR "occlusion" OR "malocclusion" OR "angle" OR "class II" OR "class 2" OR "nonocclusion" OR overbite* OR "over bite*" OR openbite* OR "open bite*" OR "deep bite*" OR deepbite* OR "over jet*" OR overjet* OR "dentofacial" OR "dento facial" OR "ramal" OR "ramus") NEAR/2 (surg* OR procedure* OR operation* OR "operative" OR correct* OR osteotom* OR "advancement" OR reduction* OR reposition* OR "setback" OR "advancement" OR retropos* OR retrus* OR fixation* OR distract* OR resect*)) OR (TS=(mandibulotom* OR mandibulectom* OR hemimandibulectom* OR maxillotom* OR maxillectom*)) OR (TS=("Le Fort" OR "lefort"))<br><i>Indexes=SCI-EXPANDED Timespan=All years</i> |                             |                    | Edit      | <input type="checkbox"/>                                                      | <input type="checkbox"/>              |
| # 1 | 5,307<br>(TS=(("class II" OR "class 2") AND malocclusion*)) OR (TS=(("posterior" NEAR/2 occlusion*)) OR (TS=(distoclusion* OR disto-occlusion* OR distoclusion*)) OR (TS=(("distal" NEAR/0 (occlusion* OR bite*)) OR (TS=(retrognath*)) OR (TS=(("prominent" NEAR/2 "upper" NEAR/2 "teeth")) OR (TS=(overjet* OR "over jet*") OR (TS=(overbite* OR "over bite*") OR (TS=(deepbite* OR "deep bite*") OR (TS=(mandib* NEAR/2 (micrognath* OR retropos* OR retrus*))) OR (TS=(maxill* NEAR/2 (prognath* OR anteposition*)))<br><i>Indexes=SCI-EXPANDED Timespan=All years</i>                                                                                                                                                                                                                                                                                          |                             |                    | Edit      | <input type="checkbox"/>                                                      | <input type="checkbox"/>              |
|     |                                                                                                                                                                                                                                                                                                                                                                                                                                                                                                                                                                                                                                                                                                                                                                                                                                                                     |                             |                    |           | <input type="radio"/> AND <input type="radio"/> OR<br>Combine                 | Select All<br>X Delete                |

## Google Scholar

|                                                                            |  |
|----------------------------------------------------------------------------|--|
| Database                                                                   |  |
| Google Scholar                                                             |  |
| Plattform (potentially incl. Version)                                      |  |
| Search with programm "Harzing's Publish or Perish", Version 6.49.6406.7079 |  |
| Time period of database                                                    |  |
| ?-present                                                                  |  |
| Time limitation                                                            |  |
| none                                                                       |  |
| Standard-searchterm                                                        |  |
| none                                                                       |  |
| Other limitations                                                          |  |
| none                                                                       |  |
| Date of search                                                             |  |
| 2019-07-16                                                                 |  |
| Executed by                                                                |  |
| Helge Knüttel                                                              |  |
| Peer Review                                                                |  |
| no                                                                         |  |
| Quantity of matches with doublets                                          |  |
| 200 (only first 200 exported)                                              |  |
| Exportformat of matches                                                    |  |
| RIS, Endnote                                                               |  |
| Searchstring typed in the field „Any of the words“                         |  |



## Searchhistory

Searchstring for Google Scholar generated with 2dsearch (<https://app.2dsearch.com/>).

Illustration:

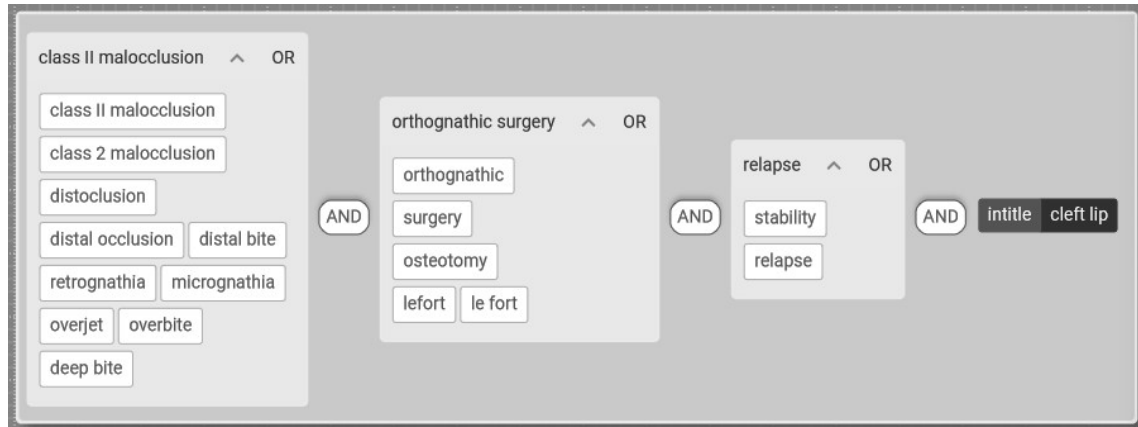

**Publish or Perish 6.49.6406.7079**

### Search terms

**Any of the words:** ("class II malocclusion"|"class 2 malocclusion"|"distoclusion"|"distal occlusion"|"distal bite"|"retrognathia"|"micrognathia"|"overjet"|"overbite"|"deep bite")("orthognathic"|"surgery"|"osteotomy"|"lefort"|"le fort")("stability"|"relapse") -intitle:"cleft lip"

**Years:** all

## WHO's International Clinical Trials Registry Platform

|                                                                                                                                                                                                                                                                                                                                                                                                                                                                                                                                                                                                                                                    |  |
|----------------------------------------------------------------------------------------------------------------------------------------------------------------------------------------------------------------------------------------------------------------------------------------------------------------------------------------------------------------------------------------------------------------------------------------------------------------------------------------------------------------------------------------------------------------------------------------------------------------------------------------------------|--|
| Database                                                                                                                                                                                                                                                                                                                                                                                                                                                                                                                                                                                                                                           |  |
| WHO's International Clinical Trials Registry Platform                                                                                                                                                                                                                                                                                                                                                                                                                                                                                                                                                                                              |  |
| Plattform (potentially incl. Version)                                                                                                                                                                                                                                                                                                                                                                                                                                                                                                                                                                                                              |  |
| <a href="http://apps.who.int/trialsearch/">http://apps.who.int/trialsearch/</a><br>Version 3.6                                                                                                                                                                                                                                                                                                                                                                                                                                                                                                                                                     |  |
| Time period of database                                                                                                                                                                                                                                                                                                                                                                                                                                                                                                                                                                                                                            |  |
| ?–current                                                                                                                                                                                                                                                                                                                                                                                                                                                                                                                                                                                                                                          |  |
| Time limitation                                                                                                                                                                                                                                                                                                                                                                                                                                                                                                                                                                                                                                    |  |
| none                                                                                                                                                                                                                                                                                                                                                                                                                                                                                                                                                                                                                                               |  |
| Standard-searfilter                                                                                                                                                                                                                                                                                                                                                                                                                                                                                                                                                                                                                                |  |
| none                                                                                                                                                                                                                                                                                                                                                                                                                                                                                                                                                                                                                                               |  |
| Other limitations                                                                                                                                                                                                                                                                                                                                                                                                                                                                                                                                                                                                                                  |  |
| none                                                                                                                                                                                                                                                                                                                                                                                                                                                                                                                                                                                                                                               |  |
| Date of search                                                                                                                                                                                                                                                                                                                                                                                                                                                                                                                                                                                                                                     |  |
| 2019-07-16                                                                                                                                                                                                                                                                                                                                                                                                                                                                                                                                                                                                                                         |  |
| Executed by                                                                                                                                                                                                                                                                                                                                                                                                                                                                                                                                                                                                                                        |  |
| Helge Knüttel                                                                                                                                                                                                                                                                                                                                                                                                                                                                                                                                                                                                                                      |  |
| Peer Review                                                                                                                                                                                                                                                                                                                                                                                                                                                                                                                                                                                                                                        |  |
| no                                                                                                                                                                                                                                                                                                                                                                                                                                                                                                                                                                                                                                                 |  |
| Quantity of matches with doublets                                                                                                                                                                                                                                                                                                                                                                                                                                                                                                                                                                                                                  |  |
| 354 records for 312 trials                                                                                                                                                                                                                                                                                                                                                                                                                                                                                                                                                                                                                         |  |
| Exportformat of matches                                                                                                                                                                                                                                                                                                                                                                                                                                                                                                                                                                                                                            |  |
| XML, CSV                                                                                                                                                                                                                                                                                                                                                                                                                                                                                                                                                                                                                                           |  |
| <p>Option „Without Synonyms“ was performed because of the potential risk of too many irrelevant matches. Phrase search did not work. There were often matches without the searched phrase e.g.: over jet.</p> <p>Quantity of matches verified in XML-file (file used for further process)<br/> <pre>grep "^ &lt;Trial&gt;" kaluza_2738_2019-07-16_ICTRP_results.xml   wc -l</pre> 312</p> <p>Quantity of matches verified in CSV-file:<br/> <pre>wc -l kaluza_2738_2019-07-16_ICTRP_results.csv</pre> 316</p> <p>Verification showed individual line breaks within the fields. That's why quantity of lines is higher than quantity of records</p> |  |

## ***Searchhistory***

354 records for 312 trials found for: malocclusion OR posterior occlusion OR class II AND occlusion OR class 2 AND occlusion OR distocclusion OR disto-occlusion OR distocclusion OR distal occlusion OR distal bite OR retrognath\* OR prominent upper teeth OR overjet OR over-jet OR overbite over-bite OR deepbite OR deep-bite OR mandib\* AND micrognath\* OR mandib\* AND retropos\* OR mandib\* AND retrus\* OR maxill\* prognath OR maxill\* AND antepos\*

## ClinicalTrials.gov

|                                                                                                                                                                                                                                                                                                                                                                                                                                                                                                                                               |  |
|-----------------------------------------------------------------------------------------------------------------------------------------------------------------------------------------------------------------------------------------------------------------------------------------------------------------------------------------------------------------------------------------------------------------------------------------------------------------------------------------------------------------------------------------------|--|
| Database                                                                                                                                                                                                                                                                                                                                                                                                                                                                                                                                      |  |
| ClinicalTrials.gov                                                                                                                                                                                                                                                                                                                                                                                                                                                                                                                            |  |
| Plattform (potentially incl. Version)                                                                                                                                                                                                                                                                                                                                                                                                                                                                                                         |  |
| https://clinicaltrials.gov/ct2/home                                                                                                                                                                                                                                                                                                                                                                                                                                                                                                           |  |
| Time period of database                                                                                                                                                                                                                                                                                                                                                                                                                                                                                                                       |  |
| ?–current                                                                                                                                                                                                                                                                                                                                                                                                                                                                                                                                     |  |
| Time limitation                                                                                                                                                                                                                                                                                                                                                                                                                                                                                                                               |  |
| none                                                                                                                                                                                                                                                                                                                                                                                                                                                                                                                                          |  |
| Standard-searchfilter                                                                                                                                                                                                                                                                                                                                                                                                                                                                                                                         |  |
| none                                                                                                                                                                                                                                                                                                                                                                                                                                                                                                                                          |  |
| Other limitations                                                                                                                                                                                                                                                                                                                                                                                                                                                                                                                             |  |
| none                                                                                                                                                                                                                                                                                                                                                                                                                                                                                                                                          |  |
| Date of search                                                                                                                                                                                                                                                                                                                                                                                                                                                                                                                                |  |
| 2019-07-16                                                                                                                                                                                                                                                                                                                                                                                                                                                                                                                                    |  |
| Executed by                                                                                                                                                                                                                                                                                                                                                                                                                                                                                                                                   |  |
| Helge Knüttel                                                                                                                                                                                                                                                                                                                                                                                                                                                                                                                                 |  |
| Peer Review                                                                                                                                                                                                                                                                                                                                                                                                                                                                                                                                   |  |
| no                                                                                                                                                                                                                                                                                                                                                                                                                                                                                                                                            |  |
| Quantity of matches with doublets                                                                                                                                                                                                                                                                                                                                                                                                                                                                                                             |  |
| 236 = 181 + 47 + 8                                                                                                                                                                                                                                                                                                                                                                                                                                                                                                                            |  |
| Exportformat of matches                                                                                                                                                                                                                                                                                                                                                                                                                                                                                                                       |  |
| tsv, xml                                                                                                                                                                                                                                                                                                                                                                                                                                                                                                                                      |  |
| <p>Basic search interface, no filters</p> <p>The search had to be separated into three strings because only 250 signs were possible. According to that the quantity of matches was exported individually for every search and there could be doublets/overlapping</p> <p>A total of 184 individual matches (NCT Numbers) are include:<br/> <code>\$ grep --no-filename "^ NCT Number: " kaluza_2738_2019-07-16_ClinicalTrials_s*_records.txt   sort   uniq   wc -l</code><br/> 184</p> <p>Extraction of doublets has to be done in citavi</p> |  |

### **Searchhistory**

181 Studies found for: malocclusion OR "posterior occlusion" OR (("class II" OR "class 2") AND occlusion) OR distocclusion OR disto-occlusion OR distocclusion OR "distal occlusion" OR "distal bite" OR retrognath OR retrognathic OR retrognathia OR retrognathism

47 Studies found for: "prominent upper teeth" OR overjet OR "over jet" OR over-jet OR overbite OR "over bite" OR over-bite OR deepbite OR "deep bite" OR deep-bite

8 Studies found for: ((mandible OR mandibular) AND (micrognathia OR micrognathism OR retroposed OR retroposition OR retrused OR retrusion)) OR ((maxilla OR maxillary) AND (prognath OR prognathic OR prognathia OR prognathism OR anteposition OR antepositioned))

## Manual search

search in contents of magazines, websites, conferences a.o.

| <b>Database</b>                                                                                                                                                                                                                                                                                                                                                | <b>quantity</b> | <b>notes</b>                                |
|----------------------------------------------------------------------------------------------------------------------------------------------------------------------------------------------------------------------------------------------------------------------------------------------------------------------------------------------------------------|-----------------|---------------------------------------------|
| MEDLINE                                                                                                                                                                                                                                                                                                                                                        | 5284            | Within doublets<br>5281 individual matches  |
| EMBASE                                                                                                                                                                                                                                                                                                                                                         | 4548            | Within doublets, 4538<br>individual matches |
| Cochrane Library: <ul style="list-style-type: none"> <li>• CDRS (Cochrane Database of Systematic Reviews)</li> <li>• DARE (Database of Abstracts of Reviews of Effect)</li> <li>• CENTRAL (Cochrane Central Register of Controlled Trials)</li> <li>• HTA (Health Technology Assessment Database)</li> <li>• EED (NHS Economic Evaluation Database)</li> </ul> | 353             |                                             |
| Science Citation Index Expanded                                                                                                                                                                                                                                                                                                                                | 2024            |                                             |
| Google Scholar                                                                                                                                                                                                                                                                                                                                                 | 200             | Only first 200 exported                     |
| WHO's International Clinical Trials Registry Platform                                                                                                                                                                                                                                                                                                          | 312             |                                             |
| ClinicalTrials.gov                                                                                                                                                                                                                                                                                                                                             | 236             | Within doublets 184<br>individual matches   |
|                                                                                                                                                                                                                                                                                                                                                                |                 |                                             |
| Gesamtzahl aus Datenbanksuche                                                                                                                                                                                                                                                                                                                                  | 12957           |                                             |

## SOURCES

1. McGowan J, Sampson M, Lefebvre C. An Evidence Based Checklist for the Peer Review of Electronic Search Strategies (PRESS EBC). *EBLIP* 2010; 5(1):149–54. Available from: URL: <http://ejournals.library.ualberta.ca/index.php/EBLIP/article/view/7402>.
2. Atkinson KM, Koenka AC, Sanchez CE, Moshontz H, Cooper H. Reporting standards for literature searches and report inclusion criteria: making research syntheses more transparent and easy to replicate. *Res. Syn. Meth.* 2015; 6(1):87–95.
3. Moher D, Liberati A, Tetzlaff J, Altman DG, The PRISMA Group. Preferred Reporting Items for Systematic Reviews and Meta-Analyses: The PRISMA Statement. *PLoS Med* 2009 [cited 2013 Feb 22]; 6(7):e1000097.
4. Rader T, Mann M, Stansfield C, Cooper C, Sampson M. Methods for documenting systematic review searches: a discussion of common issues. *Res Synth Methods* 2014; 5(2):98–115.
5. Shea BJ, Reeves BC, Wells G, Thuku M, Hamel C, Moran J et al. AMSTAR 2: A critical appraisal tool for systematic reviews that include randomised or non-randomised studies of healthcare interventions, or both. *BMJ* 2017; 358:j4008.
6. Niederstadt C, Droste S. Reporting and presenting information retrieval processes: the need for optimizing common practice in health technology assessment. *Int J Technol Assess Health Care* 2010; 26(4):450–7.



### Appendix 3 – In-/Exclusion Criteria

| study characteristics<br>(PICOS)                                                                                                            | Inclusion Criteria                                                                                        | Inclusion criteria met?            |                          |                          | Localisation<br>(page) |
|---------------------------------------------------------------------------------------------------------------------------------------------|-----------------------------------------------------------------------------------------------------------|------------------------------------|--------------------------|--------------------------|------------------------|
|                                                                                                                                             |                                                                                                           | yes                                | no                       | vague                    |                        |
| <b>Study type S</b><br>Requirement for inclusion:<br>1x yes checked, at systematic reviews with meta-analysis<br>2x yes checked is possible | Systematic Review                                                                                         | <input type="checkbox"/>           | <input type="checkbox"/> | <input type="checkbox"/> |                        |
|                                                                                                                                             | Meta-Analysis                                                                                             | <input type="checkbox"/>           | <input type="checkbox"/> | <input type="checkbox"/> |                        |
|                                                                                                                                             | Randomized-controlled trial (RCT)                                                                         | <input type="checkbox"/>           | <input type="checkbox"/> | <input type="checkbox"/> |                        |
|                                                                                                                                             | Controlled-clinical study (CCT)                                                                           | <input type="checkbox"/>           | <input type="checkbox"/> | <input type="checkbox"/> |                        |
|                                                                                                                                             | Cohort study                                                                                              | <input type="checkbox"/>           | <input type="checkbox"/> | <input type="checkbox"/> |                        |
|                                                                                                                                             | Case control study                                                                                        | <input type="checkbox"/>           | <input type="checkbox"/> | <input type="checkbox"/> |                        |
| <b>Population P</b><br>Requirement for inclusion:<br>4x yes checked, which means all 4 criteria have to apply                               | Class II-anomaly                                                                                          | <input type="checkbox"/>           | <input type="checkbox"/> | <input type="checkbox"/> |                        |
|                                                                                                                                             | No syndrome                                                                                               | <input type="checkbox"/>           | <input type="checkbox"/> | <input type="checkbox"/> |                        |
|                                                                                                                                             | No cleft lip and palate                                                                                   | <input type="checkbox"/>           | <input type="checkbox"/> | <input type="checkbox"/> |                        |
|                                                                                                                                             | No trauma                                                                                                 | <input type="checkbox"/>           | <input type="checkbox"/> | <input type="checkbox"/> |                        |
| <b>Intervention I</b><br>Requirement for inclusion :<br>1x yes checked                                                                      | (unimax) lower jaw forward                                                                                | <input type="checkbox"/>           | <input type="checkbox"/> | <input type="checkbox"/> |                        |
|                                                                                                                                             | (unimax) upper jaw up/backward                                                                            | <input type="checkbox"/>           | <input type="checkbox"/> | <input type="checkbox"/> |                        |
|                                                                                                                                             | (bimax) upper jaw up/backward + lower jaw forward                                                         | <input type="checkbox"/>           | <input type="checkbox"/> | <input type="checkbox"/> |                        |
| <b>Kontrolle C</b><br>Requirement for inclusion:<br>at least 1x yes checked                                                                 | Other intervention                                                                                        | <input type="checkbox"/>           | <input type="checkbox"/> | <input type="checkbox"/> |                        |
|                                                                                                                                             | No intervention                                                                                           | <input type="checkbox"/>           | <input type="checkbox"/> | <input type="checkbox"/> |                        |
|                                                                                                                                             | None, i.e. post OP – post Relapse (longitudinal comparison)                                               | <input type="checkbox"/>           | <input type="checkbox"/> | <input type="checkbox"/> |                        |
| <b>Outcome O</b><br>Requirement for inclusion:<br>At least 1x yes checked                                                                   | <i>Primary:</i> relapse-extent at least 1 year post OP recorded <u>quantitatively</u> (metric or angular) | <input type="checkbox"/>           | <input type="checkbox"/> | <input type="checkbox"/> |                        |
|                                                                                                                                             | <i>Secondary:</i> QoL (Quality of life) with validated survey                                             | <input type="checkbox"/>           | <input type="checkbox"/> | <input type="checkbox"/> |                        |
| INCLUSION <input type="checkbox"/>                                                                                                          |                                                                                                           | EXCLUSION <input type="checkbox"/> |                          |                          |                        |
